# Supplementary material for: Effect of Bamboo Essential Oil on the Oxidative Stability, Microbial Attributes and Sensory Quality of Chicken Meatballs
Source: MDPI journal article supplement (doi:10.3390/foods12010218), 2023-01-03
Supplement: s1 [file s1]

## Supplementary files (S1)

**Table S1. Ingredients used for formulation of meatball emulsion with bamboo essential oil**

| Ingredients (%)            | Control | BEO-I (T1) | BEO-II(T2) |
|----------------------------|---------|------------|------------|
| Chicken meat               | 73.5    | 73.5       | 73.5       |
| Ice flakes                 | 10      | 10         | 10         |
| Refined vegetable oil      | 7       | 7          | 7          |
| Salt                       | 1.6     | 1.6        | 1.6        |
| Condiments*                | 3       | 3          | 3          |
| Refined wheat flour        | 3       | 3          | 3          |
| Dry spice mix**            | 1.8     | 1.8        | 1.8        |
| Sodium nitrite (ppm)       | 150     | 150        | 150        |
| Bamboo essential oil (ppm) | 0       | 15         | 30         |

Control= No BEO; BEO-I (T1) =15 ppm Bamboo essential oil and BEO-II (T2)= 30 ppm Bamboo essential oil \*Condiments: garlic and onion (4:1). \*\*Dry spice mix – aniseed, black pepper, capsicum, caraway seed, cardamom, cinnamon, cloves, coriander powder, cumin seed, turmeric and dried ginger.

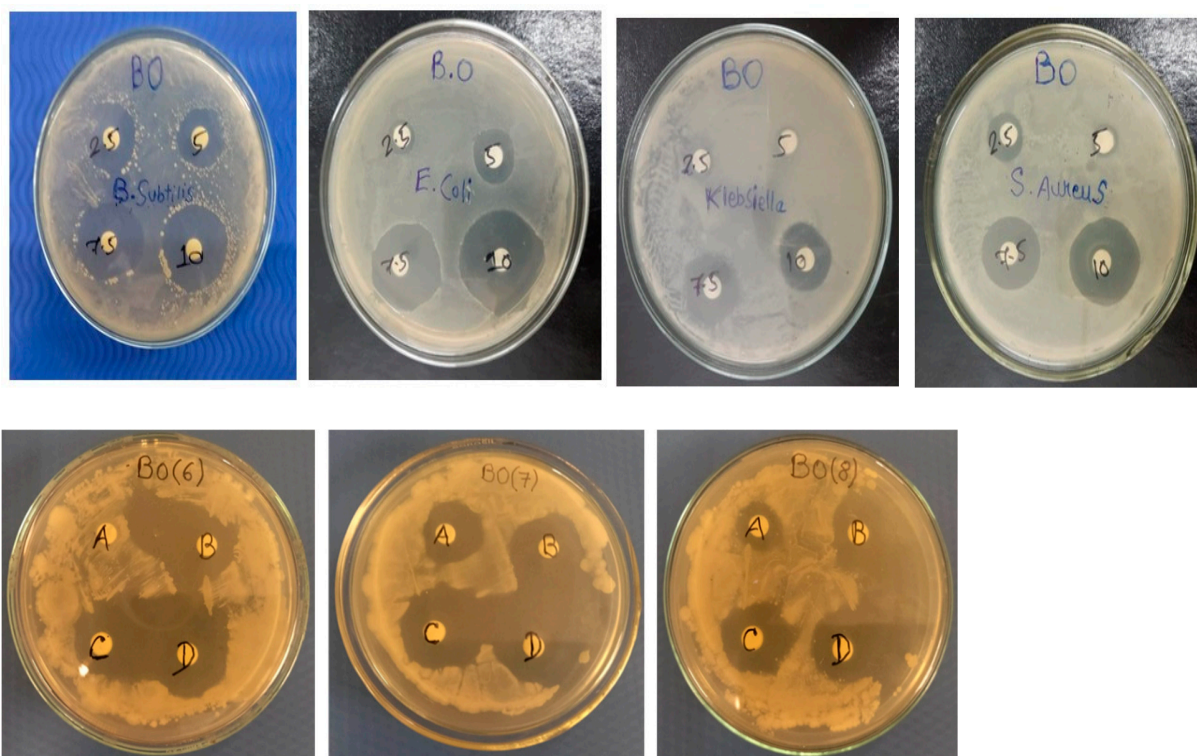

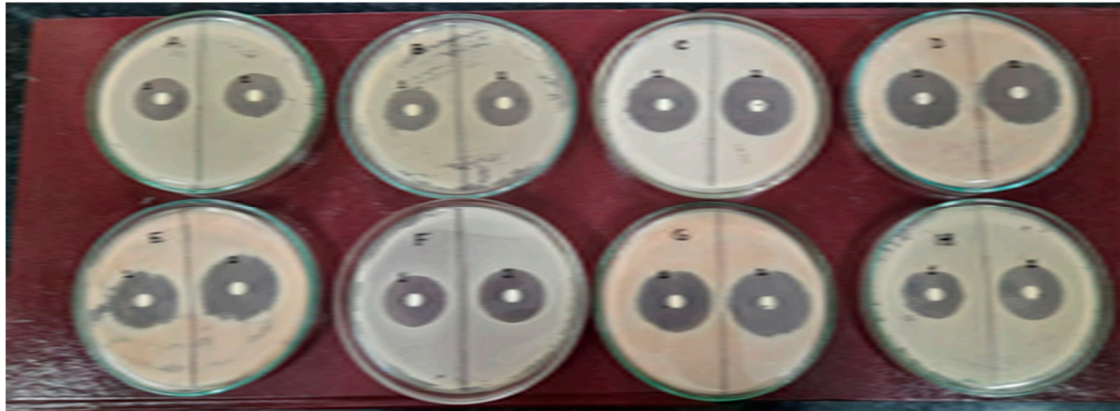

**Figure S1: ZOI formed by different concentrations of BEO against selected pathogenic pure bacterial strains**

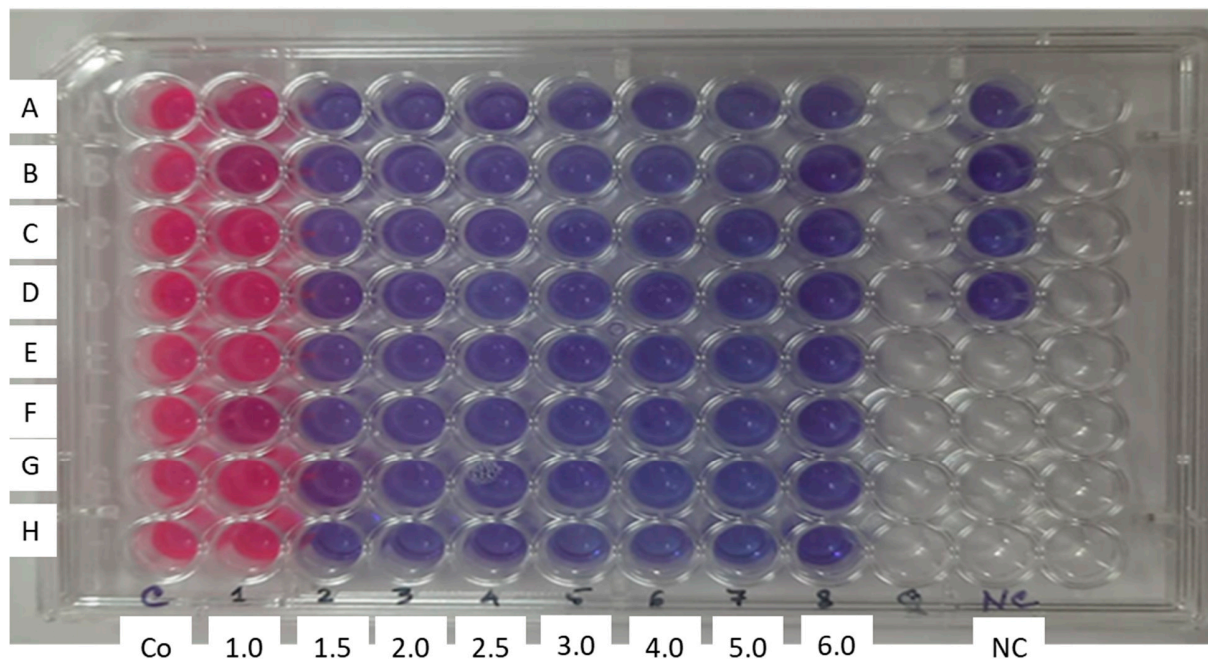

**Figure S2: MIC determination of bacterial strains against BEO using resazurin broth microdilution assay**

MIC determination of bacterial strains against BEO using resazurin broth microdilution assay. Bacterial strains involved in study: A) *E.coli*, B) *Bacillus Subtilis*, C) *Shigella flexneri*, D) *Proteus vulgaris*, E) *Salmonella Typhimurium*, F) *Staphylococcus aureus*, G) *Vibrio cholerae* (0139), H) *Klebsiella pneumonia*. The lower markings show the concentrations of BEO used in each well ( $\mu\text{g}/\mu\text{l}$ ). NC represents negative control.



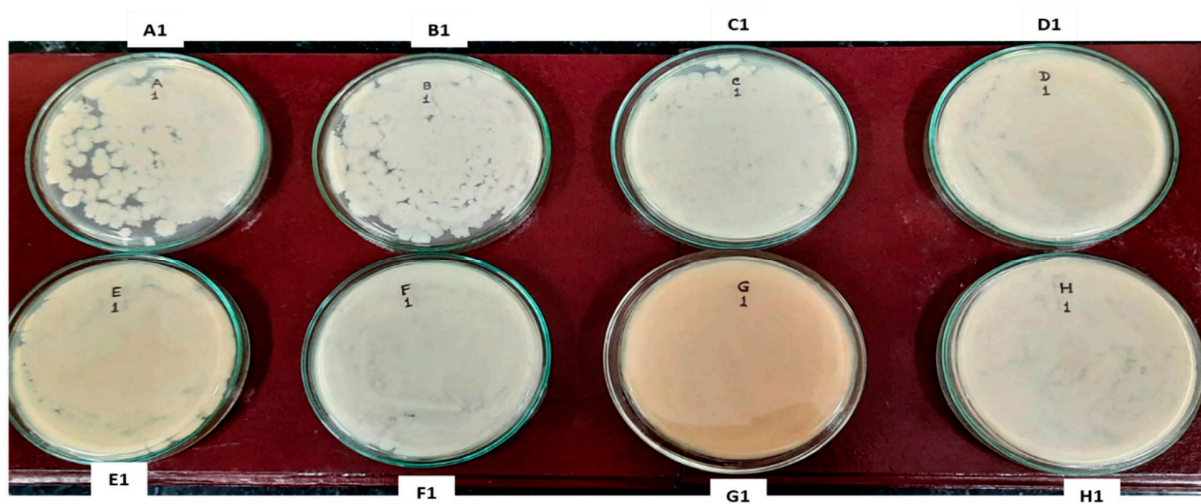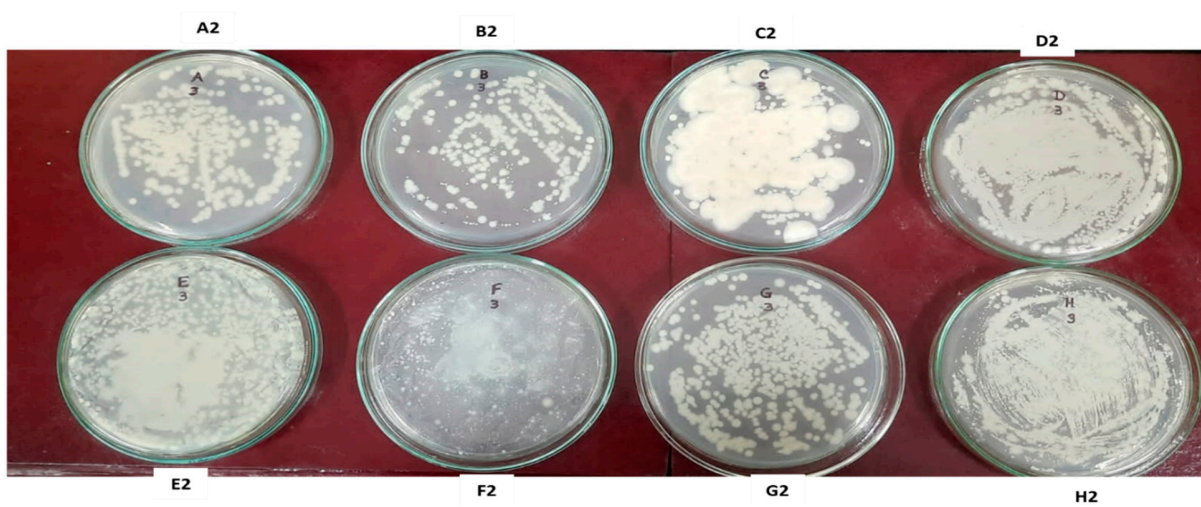

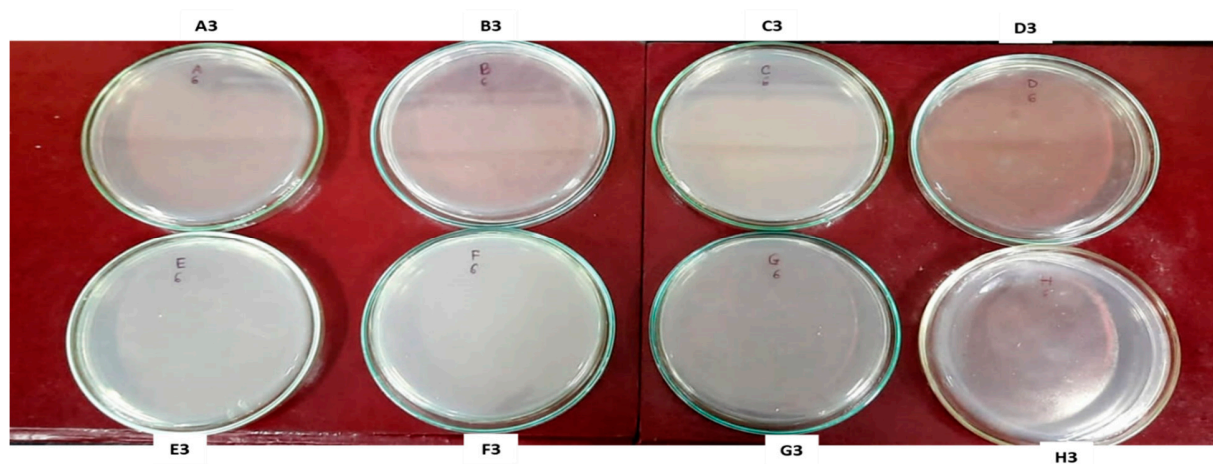

**Figure S3: MBC determination of bacterial strains against BEO using spread plate method after broth microdilution assay**
